# Supplementary material for: MUC16 overexpression induced by gene mutations promotes lung cancer cell growth and invasion
Source: PubMed Central journal article supplement (PMC5844741; doi:10.18632/oncotarget.24203), 2018-01-12
Supplement: oncotarget-09-12226-s001.pdf [file oncotarget-09-12226-s001.pdf]

# MUC16 overexpression induced by gene mutations promotes lung cancer cell growth and invasion

## SUPPLEMENTARY MATERIALS

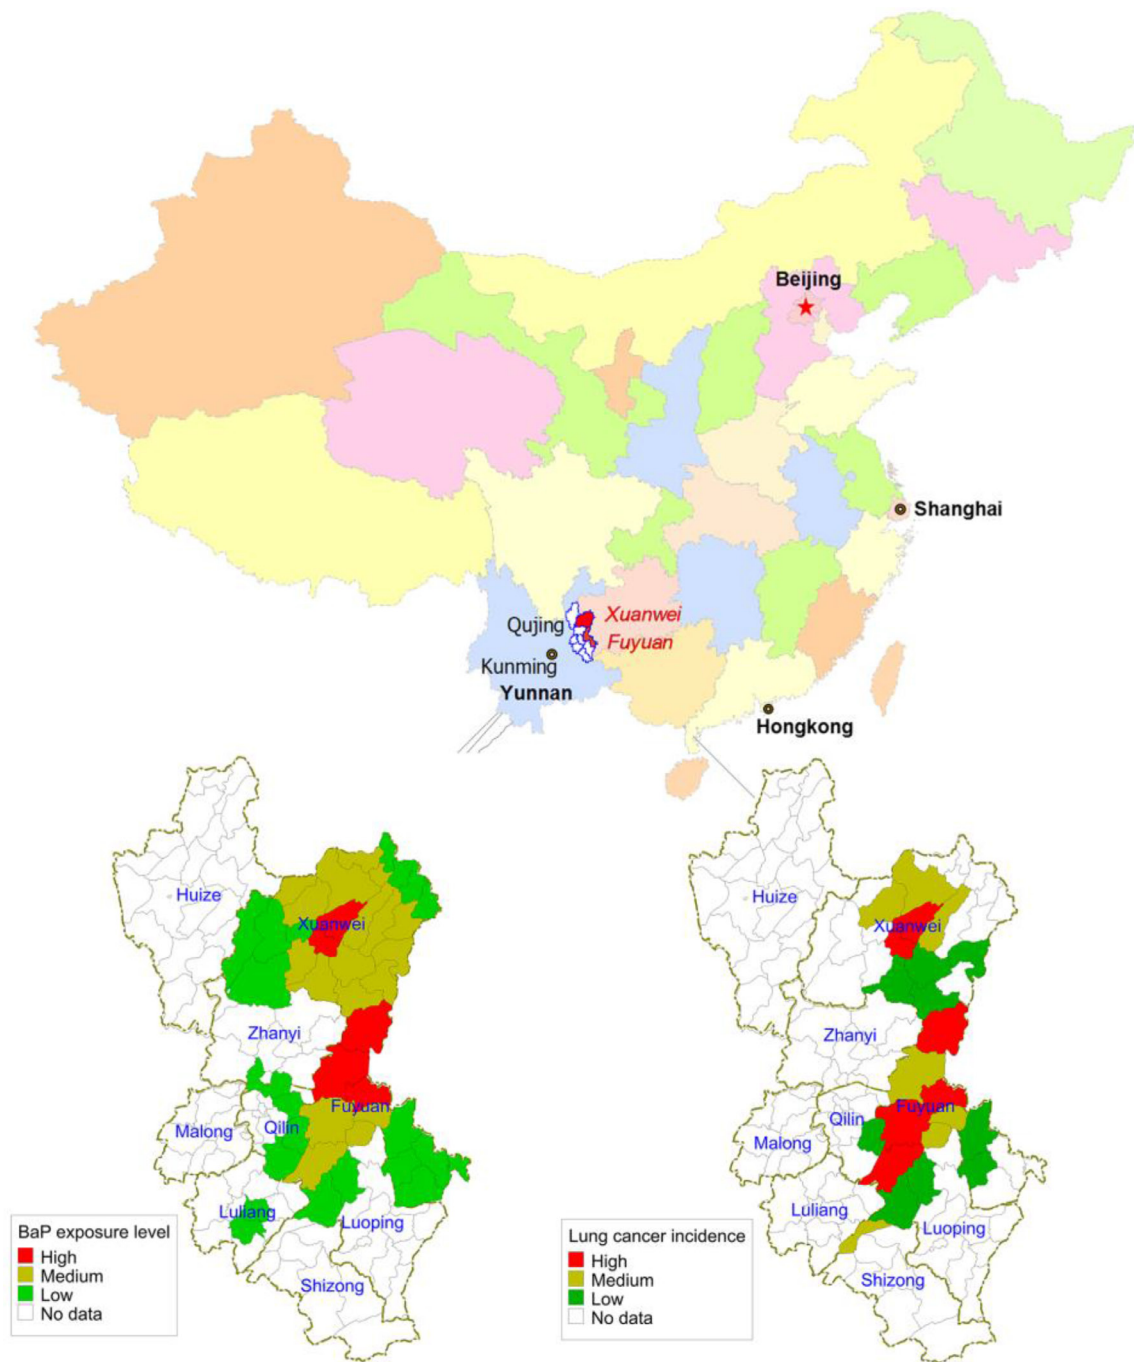

**Supplementary Figure 1: BaP exposure levels and lung cancer incidence in Xuanwei and Fuyuan.** Both Xuanwei and Fuyuan are located in the northeast region of Yunnan Province, China. Xuanwei and Fuyuan are rich in smoky coal mines. The high levels of indoor and outdoor air pollution are caused by burning smoky coal. BaP exposure levels are divided into three categories: high (A) BaP exposure levels: > 170 ng/m<sup>3</sup>, medium (B) BaP exposure levels: 60~170 ng/m<sup>3</sup>, and low (C) < 60 ng/m<sup>3</sup>. The incidence of lung cancer is strongly correlated with the BaP exposure levels.

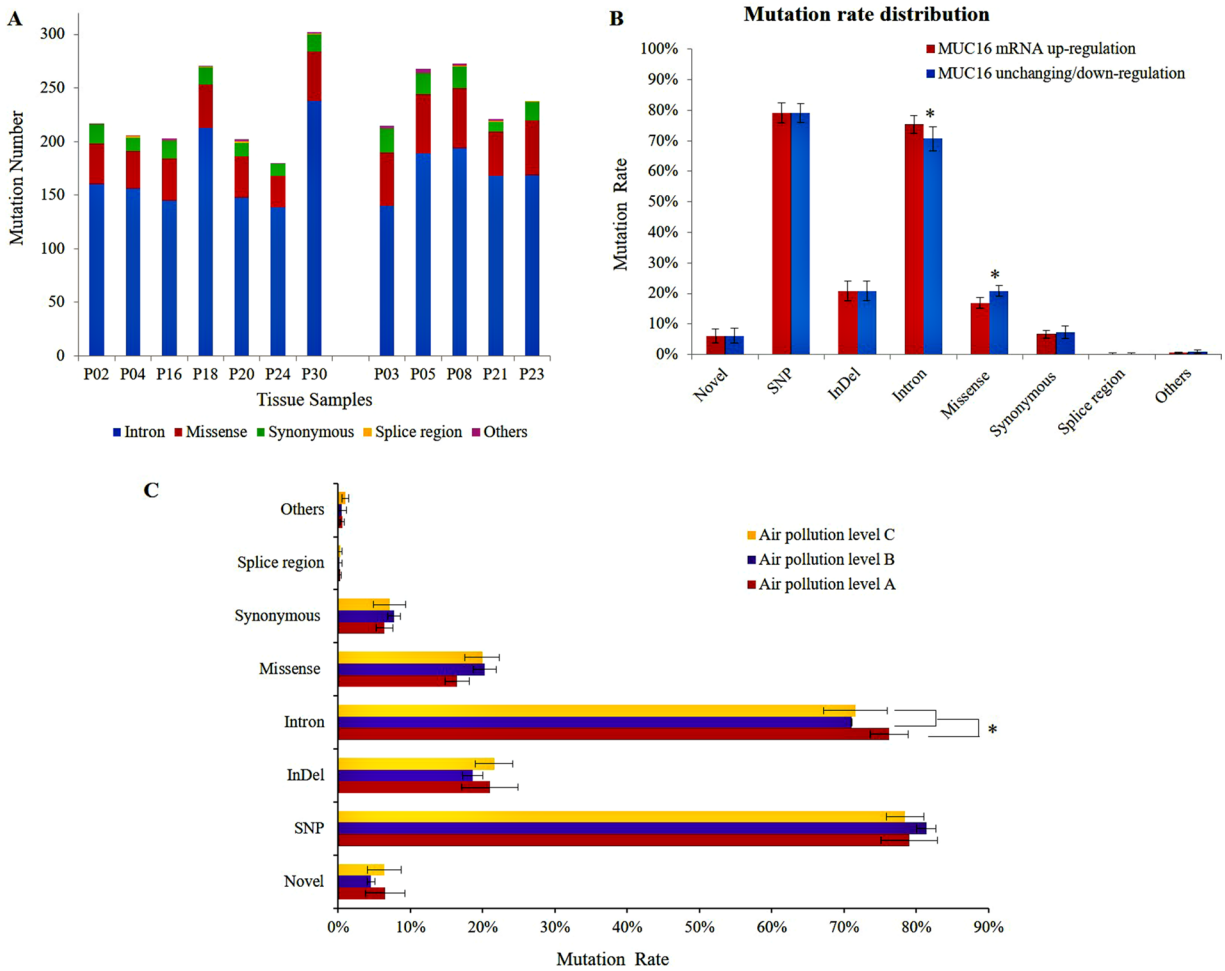

**Supplementary Figure 2: Detailed information for various types of *MUC16* gene mutations.** (A) Various types of mutations within the *MUC16* gene were identified in the 12 samples of lung cancer from patients residing in air-polluted regions (Xuanwei and Fuyuan). (B) Relationships between the types of *MUC16* gene mutations and *MUC16* mRNA expression. Note: the mutation rate of the intron was statistically different between the *MUC16* mRNA up-regulated group and the *MUC16* mRNA unchanged/down-regulated group. (C) Relationships between the types of *MUC16* gene mutations and the degree of air pollution. Note: the mutation rate of the intron was correlated with a high degree of air pollution. Air pollution level A: heavily polluted region; Air pollution level B: moderately polluted region; Air pollution level C: less polluted region. (Fisher's exact test, \* $p < 0.05$ ).

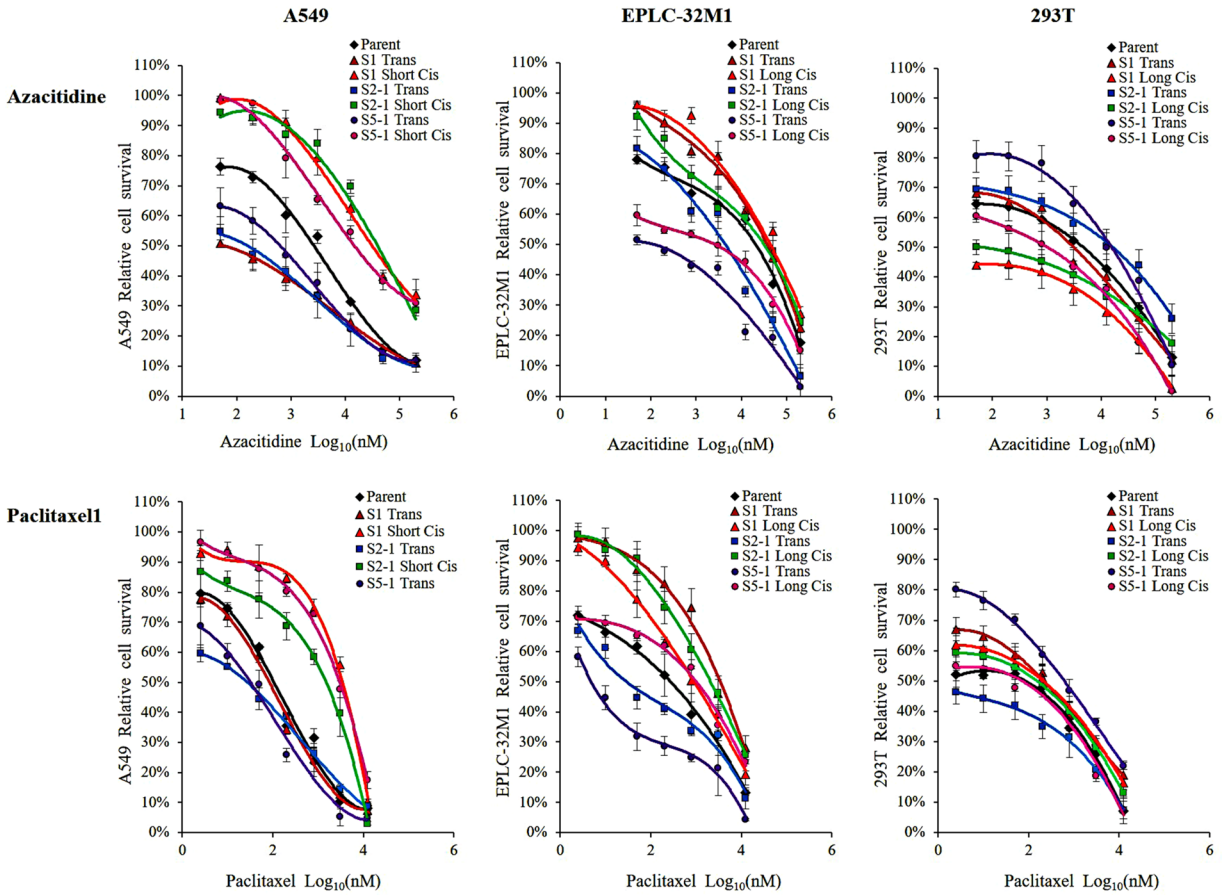

**Supplementary Figure 3: Azacitidine and paclitaxel reactivity in cultured cells after *MUC16* gene editing.** Parent cells, transfected cells, and cisplatin-resistant cell populations were incubated with different concentrations of azacitidine and paclitaxel, and then cell viability was determined. The cell-survival curves demonstrate no significant changes in the resistance to azacitidine and paclitaxel in the cultured cells after treatment compared to that of their respective parent cells. Note: the cisplatin-resistant cell populations were also sensitive to azacitidine and paclitaxel. Parent: parent cells (wild types); S1, S2-1, and S5-1: mutation systems used in this study; Trans: transfection alone; Short Cis: transfection plus short-term cisplatin treatment; Long Cis: transfection plus long-term cisplatin treatment.

**Supplementary Table 1: Basic information of lung cancer patients included in the present study.**  
See Supplementary\_Table\_1

**Supplementary Table 2: The cell lines used in this study**

| <b>Name</b> | <b>Cell type</b>                             | <b>Culture media</b> | <b>Resource</b>                               |
|-------------|----------------------------------------------|----------------------|-----------------------------------------------|
| EPLC-32M1   | Lung squamous cell carcinoma                 | RPMI 10%FBS          | German Cancer Research Center                 |
| SPC-A-1     | Lung adenocarcinoma                          | RPMI 10%FBS          | Cell Bank of Chinese Academy of Science       |
| A549        | Lung adenocarcinoma                          | RPMI 10%FBS          | American Type Culture Collection              |
| GLC-82      | Lung adenocarcinoma                          | RPMI 10%FBS          | Cell Bank of Chinese Academy of Science       |
| XLA-07      | Lung adenocarcinoma                          | RPMI 10%FBS          | Kunming Medical College, Kunming, China       |
| XL-JT       | Lung adenocarcinoma                          | RPMI 10%FBS          | Kunming Medical College, Kunming, China       |
| 801D        | Large cell lung cancer                       | RPMI 10%FBS          | Cell Bank of Chinese Academy of Science       |
| NCI-H460    | Large cell lung carcinoma                    | RPMI 10%FBS          | Gifted by Prof. Zhou Guang Biao, Beijing      |
| 95-D        | Large cell lung carcinoma                    | RPMI 10%FBS          | Gifted by Prof. Zhou Guang Biao, Beijing      |
| NCI-H292    | Mucoepidermoid lung Carcinoma                | RPMI 10%FBS          | American Type Culture Collection              |
| NCI-H446    | Small cell lung cancer                       | RPMI 10%FBS          | American Type Culture Collection              |
| 16HBE       | Immortalized human bronchial epithelial cell | DMEM 10%FBS          | Cell Bank of the Peking Union Medical College |
| Beas-2B     | Immortalized human bronchial epithelial cell | DMEM 10%FBS          | American Type Culture Collection              |
| 293T        | Human embryonic kidney cells                 | DMEM 10%FBS          | American Type Culture Collection              |

**Supplementary Table 3: *MUC16* sgRNA oligonucleotides**

| Targets       | sgRNA Sequence (5'-3')      | Single/Double cut |
|---------------|-----------------------------|-------------------|
| Specific 1F   | CACCGATGATGGTGGTGATAACAA    | Single cut        |
| Specific 1R   | AAACTTGTTATCACCACCATCATC    |                   |
| Specific 2F   | CACCGATGATGATGATGATGGGGG    | Single cut        |
| Specific 2R   | AAACCCCCCATCATCATCATCATC    |                   |
| Specific 2-1F | CACCGATTGTGATGATGATGATGAT   | Double cut        |
| Specific 2-1R | AAACATCATCATCATCATCACAATC   |                   |
| Specific 2-2F | CACCGGCGGTGATGATGATTGCAG    |                   |
| Specific 2-2R | AAACCTGCAATCATCATCACCGCC    |                   |
| Specific 4F   | CACCGTGTGGTGATGATAATGTTCCG  | Single cut        |
| Specific 4R   | AAACCGAACATTATCATCACACAC    |                   |
| Specific 5F   | CACCGAAAAAAAAAAAAAGACGGAGGT | Single cut        |
| Specific 5R   | AAACACCTCCGTCTTTTTTTTTTTC   |                   |
| Specific 5-1F | CACCGCCAGCCTGGGCAATGGAGCT   | Double cut        |
| Specific 5-1R | AAACAGCTCCATTGCCCAGGCTGGC   |                   |
| Specific 5-2F | AAACAACCCTTAACCCTGCCTTGTC   |                   |
| Specific 5-2R | CACCGACAAGGCAGGGTTAAGGGTT   |                   |
| Region 1-1F   | CACCGCAGCCTACCCGGCTCTAGCA   | Single cut        |
| Region 1-1R   | AAACTGCTAGAGCCGGGTAGGCTGC   |                   |
| Region 1-2F   | AAACGGAGCGGTGTAGGACCAATAC   | Single cut        |
| Region 1-2R   | CACCGTATTGGTCCTACACCGCTCC   |                   |
| Region 1-3F   | CACCGTGTATAAGAGTTTCCTAGGC   | Single cut        |
| Region 1-3R   | AAACGCCTAGGAAACTCTTATACAC   |                   |
| Region 1-4F   | CACCGCCCAGGTCTGCCTATCAAGC   | Single cut        |
| Region 1-4R   | AAACGCTTGATAGGCAGACCTGGGC   |                   |
| Region 1-5F   | AAACCAGCAGCATGGTTTTATTTC    | Single cut        |
| Region 1-5R   | CACCGAAATAAAACCATGCTGCTG    |                   |
| Region 1-6F   | AAACGTTGTATGCCCTTTCCTCTC    | Single cut        |
| Region 1-6R   | CACCGAGAGGAAAGGGCATAACAAC   |                   |
| Region 1-7F   | AAACTCGGTTTCGAGTACATCAGC    | Single cut        |
| Region 1-7R   | CACCGCTGATGTACTGCGAACCGA    |                   |
| Region 1-8F   | AAACAGCGTGTGGACCTGAAATTGC   | Single cut        |
| Region 1-8R   | CACCGCAATTTTCAGTCCACACGCT   |                   |
| Region 1-9F   | CACCGCTTCACTTCACTATGTATTC   | Single cut        |
| Region 1-9R   | AAACGAATACATAGTGAAGTGAAGC   |                   |
| U6-F          | GAGGGCCTATTTCCCATGATTCC     | Sequencing Primer |
| U6-R          | GTTGGGCGGTCAGCCAGGCGGGC     |                   |

PAM sequences are labeled in red. The oligomers were designed by using single cuts at specific sites spanning the mutation site if there are no reported any nonspecific matching. If nonspecific matching was reported, double cuts were made to obtain more precise specific mutations.

**Supplementary Table 4: Time and dosage concentrations of cisplatin treatment in the selected cell lines**

| Cell line | Long term cisplatin treatment  |                       | Short term cisplatin treatment |                       |
|-----------|--------------------------------|-----------------------|--------------------------------|-----------------------|
|           | Cisplatin dose $\mu\text{M/L}$ | No. of treatment days | Cisplatin dose $\mu\text{M/L}$ | No. of treatment days |
| A549      | 10                             | 10                    | 1.5                            | 2                     |
| EPLC-32M1 | 1                              | 10                    | 0.2                            | 5                     |
| SPC-A1    | -                              | -                     | 1.5                            | 2                     |
| GLC-82    | 1.5                            | 10                    | 1.5                            | 3                     |
| 801-D     | 2                              | 15                    | 1.5                            | 3                     |
| 293T      | 5                              | 30                    | -                              | -                     |

**Supplementary Table 5: Drug concentrations used in the cytotoxicity assay**

| Cell lines | Drug conc. | Cisplatin( $\mu\text{M}$ ) | Paclitaxel (nM) | Azacitidine (nM) |
|------------|------------|----------------------------|-----------------|------------------|
| A549       | 7          | 2.5                        | 2.5             | 50               |
|            | 6          | 5                          | 10              | 200              |
|            | 5          | 10                         | 50              | 800              |
|            | 4          | 20                         | 200             | 3100             |
|            | 3          | 40                         | 800             | 12500            |
|            | 2          | 80                         | 3100            | 50000            |
|            | 1          | 120                        | 12500           | 200000           |
| EPLC-32M1  | 7          | 1.25                       | 2.5             | 50               |
|            | 6          | 2.5                        | 10              | 200              |
|            | 5          | 5                          | 50              | 800              |
|            | 4          | 10                         | 200             | 3100             |
|            | 3          | 20                         | 800             | 12500            |
|            | 2          | 40                         | 3100            | 50000            |
|            | 1          | 80                         | 12500           | 200000           |
| 293T       | 7          | 2.5                        | 2.5             | 50               |
|            | 6          | 5                          | 10              | 200              |
|            | 5          | 10                         | 50              | 800              |
|            | 4          | 20                         | 200             | 3100             |
|            | 3          | 40                         | 800             | 12500            |
|            | 2          | 80                         | 3100            | 50000            |
|            | 1          | 120                        | 12500           | 200000           |

An incubation time of approximately 72 hours was employed for each drug at each specific concentration.

**Supplementary Table 6: Mutation distribution within the *MUC16* gene.**

**Sheet 1: The overall mutations within the *MUC16* gene in the *MUC16* mRNA up-regulated and *MUC16* mRNA unchanged/down-regulated tissue samples. See Supplementary**

**Sheet 2: The specific mutations within the *MUC16* gene related to *MUC16* mRNA up-regulation and the *MUC16* mRNA unchanged/down-regulation. See Supplementary**
